# Supplementary figures and images for: Exploring Multi-Tissue Alternative Splicing and Skeletal Muscle Metabolism Regulation in Obese- and Lean-Type Pigs
Source: MDPI journal article supplement (doi:10.3390/genes15020196), 2024-01-31

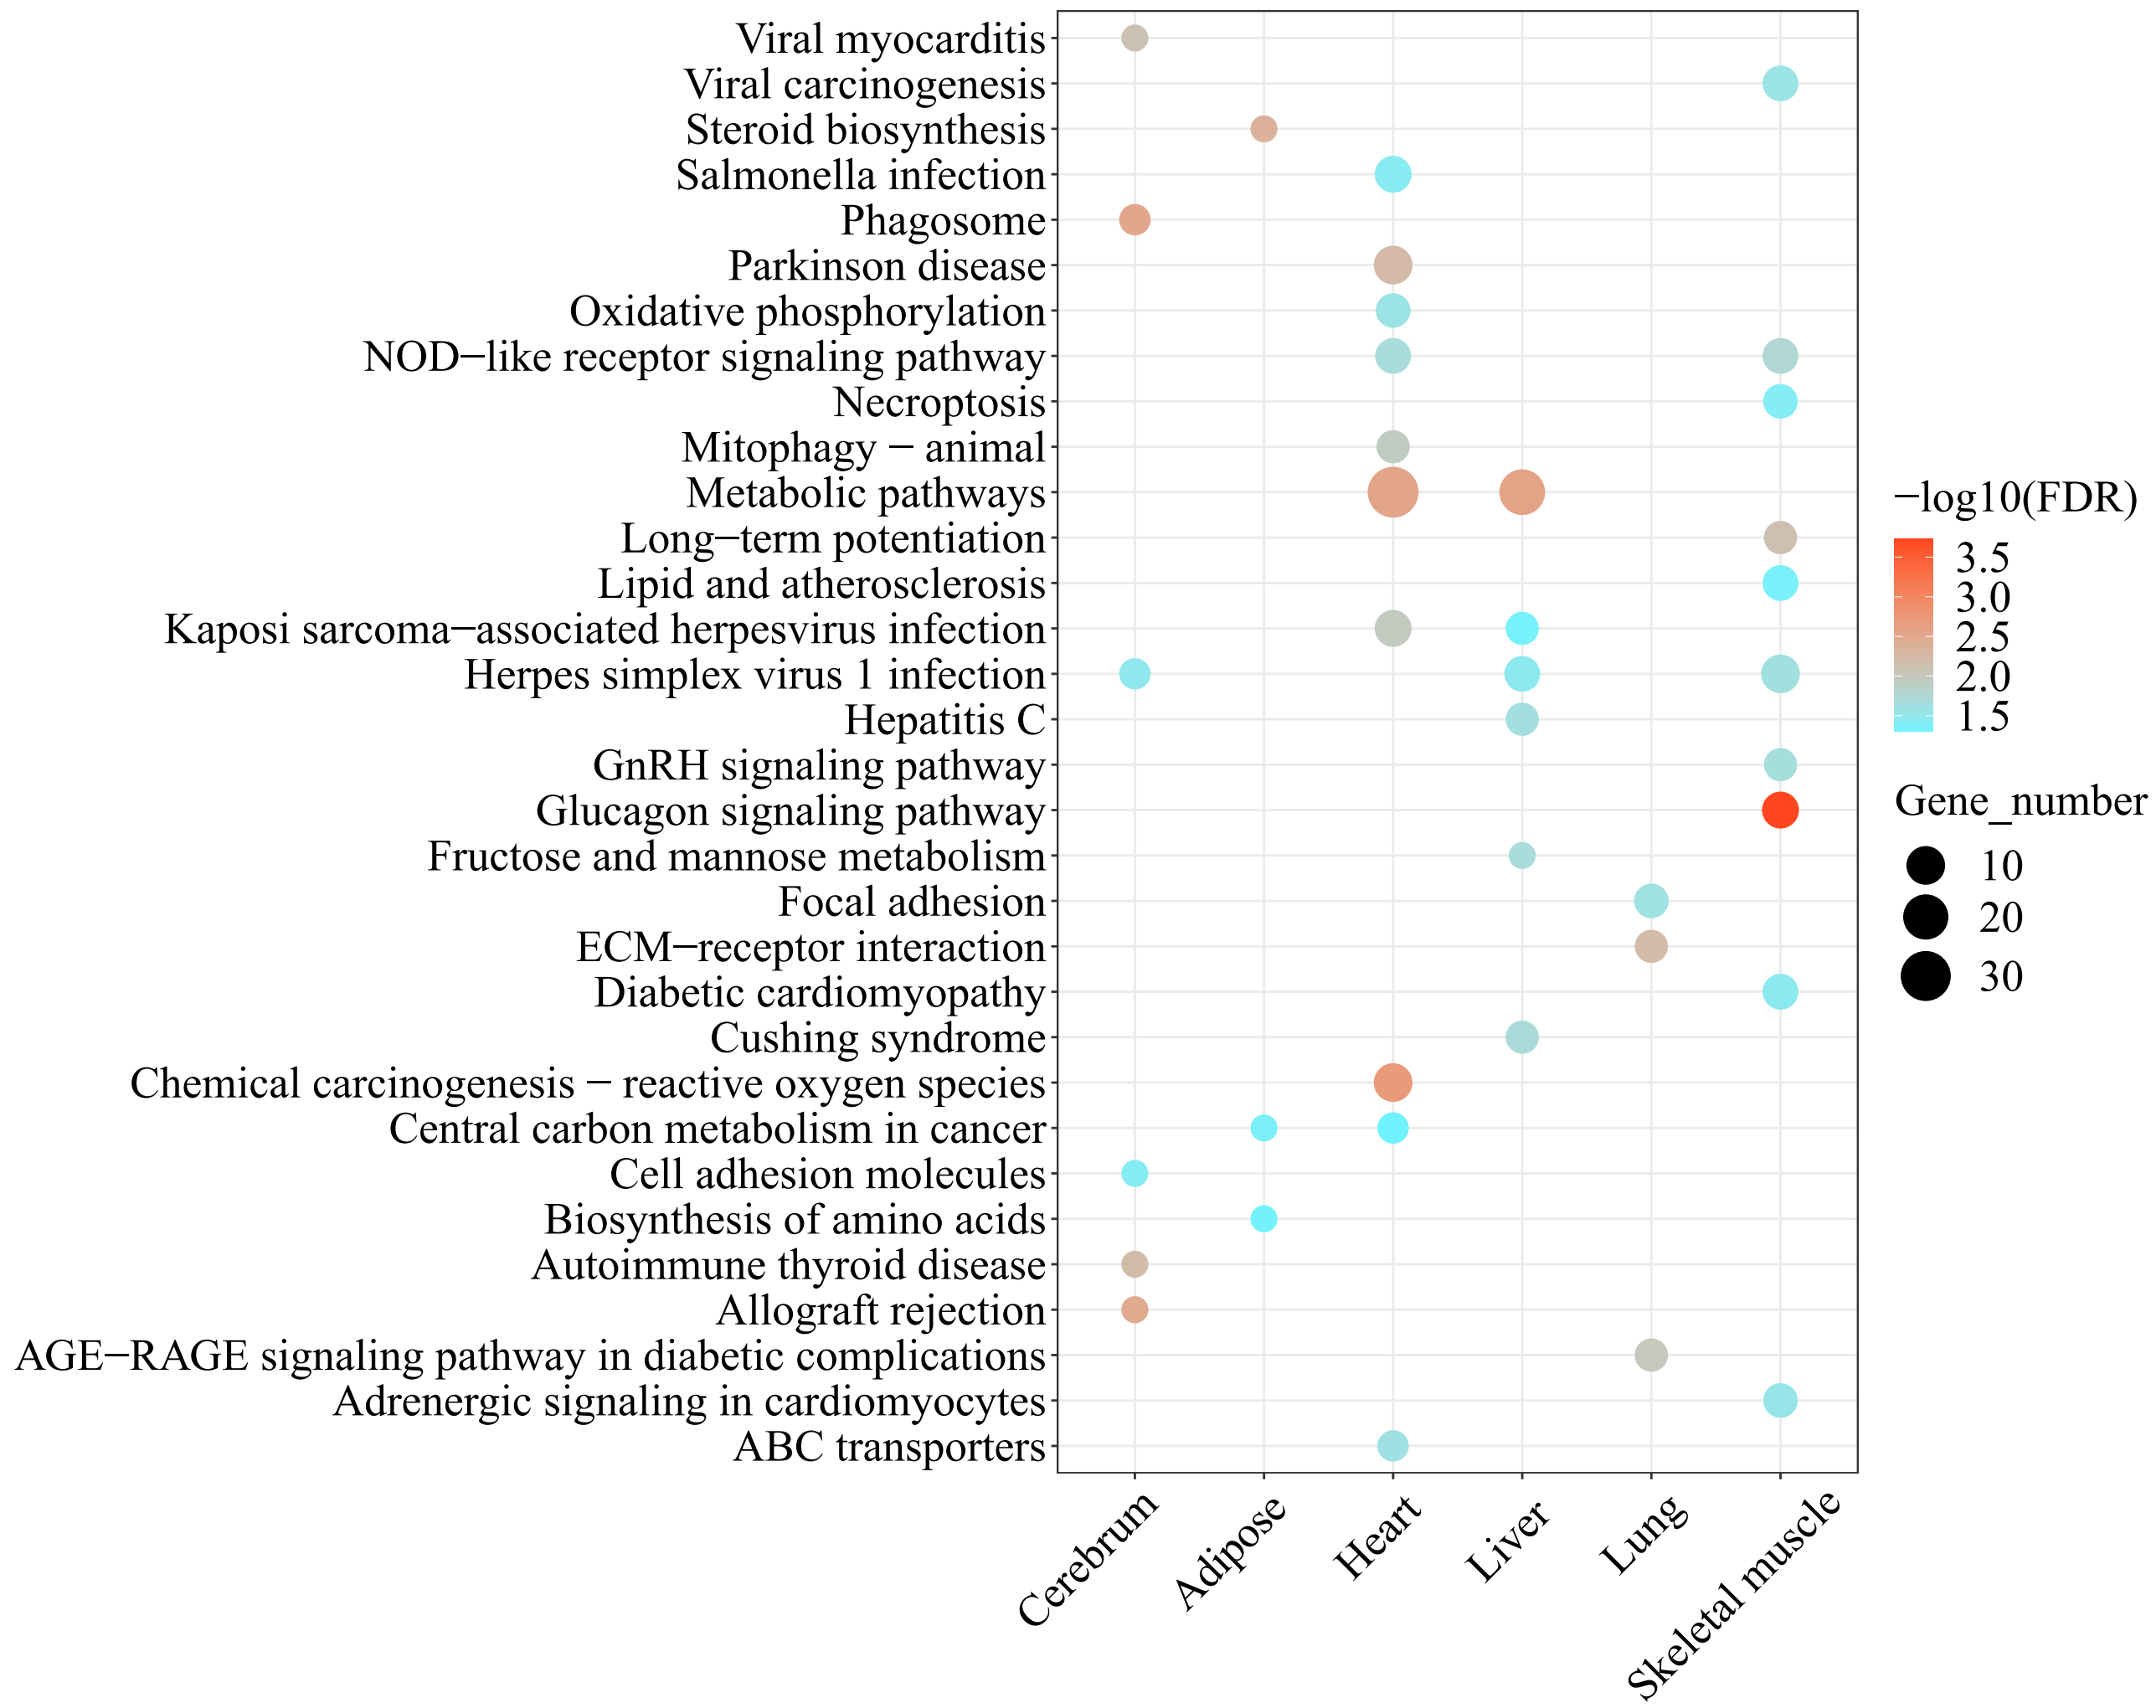

Supplement: s1 [file s1]

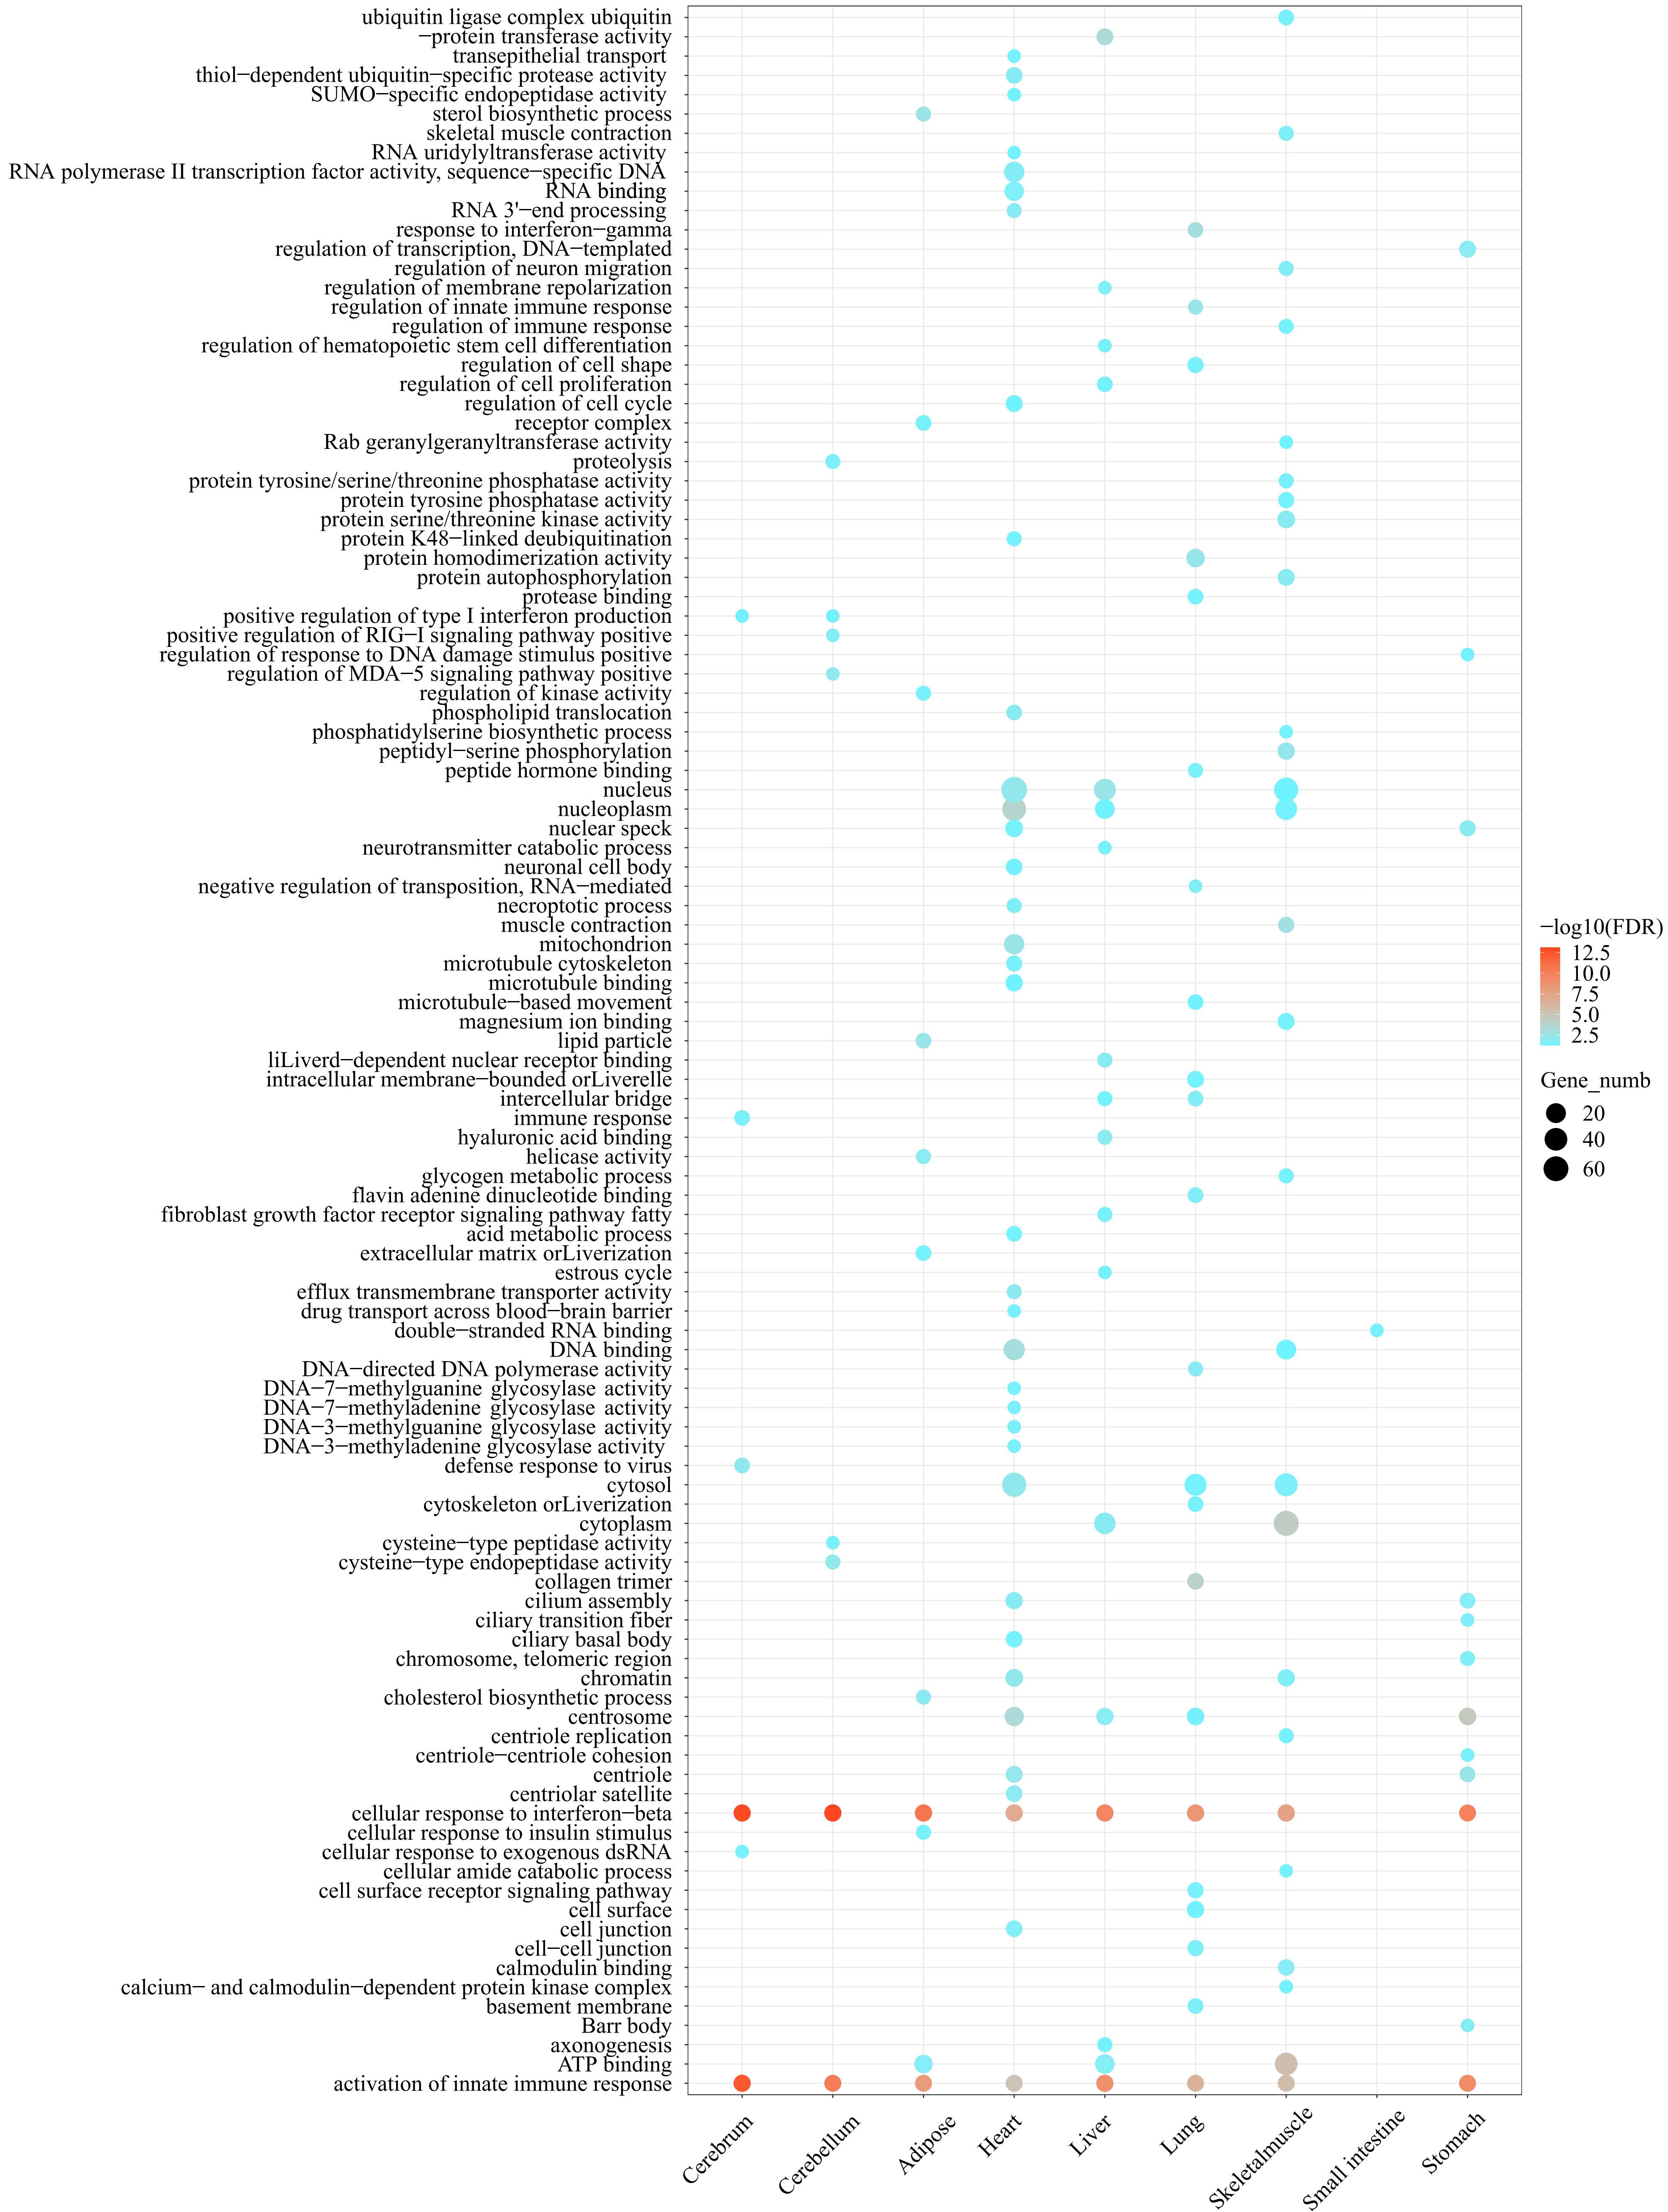

Supplement: s1 [file s1]
